# Supplementary material
Source: PubMed Central journal article supplement (PMC6484790)
Supplement: jamacardiol-4-363-s001.pdf [file jamacardiol-4-363-s001.pdf]

## Supplementary Online Content

Kytömaa S, Hegde S, Claggett B, et al. Association of influenza-like illness activity with hospitalizations for heart failure: the Atherosclerosis Risk in Communities Study. *JAMA Cardiol*. Published online March 27, 2019. doi:10.1001/jamacardio.2019.0549

**eTable 1.** Demographics of ARIC Surveillance Communities based on the 2010 U.S Census

**eTable 2.** Stations measuring monthly average temperatures

**eTable 3.** Median weighted monthly number of heart failure hospitalization by region and demographic strata

**eTable 4.** Median weighted monthly number of myocardial infarction hospitalization by region and demographic strata

**eTable 5.** Association between monthly influenza activity and hospitalizations for heart failure per 5% increase in influenza activity by age, region, ejection fraction and history of heart failure hospitalizations

### **eMethods**

This supplementary material has been provided by the authors to give readers additional information about their work.

**eTable 1.** Demographics of ARIC Surveillance Communities based on the 2010 U.S Census

|                  | Forsyth Co, NC |         |         | Jackson, MS |         |         | Minneapolis, MN |         |         | Washington Co, MD |         |         |
|------------------|----------------|---------|---------|-------------|---------|---------|-----------------|---------|---------|-------------------|---------|---------|
| <b>Age Group</b> | N              | %Female | % White | N           | %Female | % White | N               | %Female | % White | N                 | %Female | % White |
| 35-44            | 41,201         | 52      | 69.2    | 19,659      | 55      | 16.7    | 27,941          | 50      | 79.3    | 19,873            | 47      | 87.2    |
| 44-54            | 48,076         | 53      | 72.5    | 22,405      | 54      | 19.8    | 34,697          | 51      | 86.6    | 22,388            | 48      | 90.6    |
| 55-64            | 40,286         | 54      | 75.4    | 17,774      | 55      | 27.6    | 27,468          | 52      | 91.4    | 17,504            | 50      | 94.8    |
| 65-74            | 23,800         | 55      | 79.1    | 9,230       | 58      | 34.1    | 14,706          | 55      | 94.0    | 10,802            | 53      | 96.8    |
| 75-84            | 15,143         | 61      | 83.8    | 5,480       | 63      | 47.1    | 10,038          | 59      | 96.7    | 70,11             | 58      | 98.2    |
| 85+              | 5,878          | 68      | 85.3    | 2,408       | 71      | 52.6    | 4,759           | 67      | 98.1    | 30,61             | 69      | 98.8    |
| <b>Total</b>     | 174,384        | 54      | 74.7    | 76,956      | 56      | 25.5    | 119,609         | 53      | 88.2    | 80,639            | 51      | 92.5    |

**eTable 2. Stations measuring monthly average temperatures**

| Region                | Station Name                               | Elevation |
|-----------------------|--------------------------------------------|-----------|
| Washington County, MD | Hagerstown Washington Co Regional Airport  | 214.9 m   |
| Forsyth Co, NC        | King Station                               | 268.2 m   |
| Minneapolis, MN       | Minneapolis St. Paul International Airport | 265.8 m   |
| Jackson, MS           | Jackson International Airport              | 100.6 m   |

| <b>eTable 3. Median weighted monthly number of heart failure hospitalization by region and demographic strata</b> |               |             |                               |                               |                               |                               |
|-------------------------------------------------------------------------------------------------------------------|---------------|-------------|-------------------------------|-------------------------------|-------------------------------|-------------------------------|
| <b>Demographic Strata</b>                                                                                         |               |             | <b>Forsyth Co, NC</b>         | <b>Jackson, MS</b>            | <b>Minneapolis, MN</b>        | <b>Washington Co, MD</b>      |
| <b>Age</b>                                                                                                        | <b>Gender</b> | <b>Race</b> | Median event count (max, min) |
| 55-74                                                                                                             | Female        | Black       | 15 (3-45)                     | 15 (0-45)                     | 0 (0-11)                      | 0 (0-6)                       |
|                                                                                                                   |               | White       | 13 (0-26)                     | 2 (0-10)                      | 5 (0-27)                      | 6 (0-24)                      |
|                                                                                                                   | Male          | Black       | 16 (6-39)                     | 16 (6-35)                     | 0 (0-15)                      | 0 (0-12)                      |
|                                                                                                                   |               | White       | 15 (0-35)                     | 4 (0-10)                      | 11(0-23)                      | 9 (0-25)                      |
| 75-84                                                                                                             | Female        | Black       | 5 (0-21)                      | 7 (0-31)                      | 0 (0-8)                       | 0 (0-5)                       |
|                                                                                                                   |               | White       | 10 (0-27)                     | 3 (0-11)                      | 11 (0-27)                     | 6 (0-15)                      |
|                                                                                                                   | Male          | Black       | 4 (0-11)                      | 4 (0-11)                      | 0 (0-8)                       | 0 (0-5)                       |
|                                                                                                                   |               | White       | 15 (0-30)                     | 4 (0-10)                      | 8 (0-30)                      | 6 (0-18)                      |
| 85+                                                                                                               | Female        | Black       | 5 (0-13)                      | 6 (0-31)                      | 0 (0-8)                       | 0 (0-5)                       |
|                                                                                                                   |               | White       | 12 (0-34)                     | 3 (0-19)                      | 15 (0-38)                     | 9 (0-25)                      |
|                                                                                                                   | Male          | Black       | 2 (0-6)                       | 3 (0-12)                      | 0 (0-0)                       | 0 (0-5)                       |
|                                                                                                                   |               | White       | 9 (0-27)                      | 2 (0-8)                       | 8 (0-38)                      | 5 (0-16)                      |

**eTable 4.** Median weighted monthly number of myocardial infarction hospitalization by region and demographic strata

| Demographic Strata |        |       | Forsyth Co, NC                | Jackson, MS                   | Minneapolis, MN               | Washington Co, MD             |
|--------------------|--------|-------|-------------------------------|-------------------------------|-------------------------------|-------------------------------|
| Age                | Gender | Race  | Median event count (max, min) |
| 55-74              | Female | Black | 13 (0-31)                     | 15 (4-35)                     | 4 (0, 25)                     | 0 (0,8)                       |
|                    |        | White | 27 (0-83)                     | 3 (0-14)                      | 17 (0,31)                     | 12 (3, 26)                    |
|                    | Male   | Black | 20 (8-60)                     | 19 (0-35)                     | 4 (0,28)                      | 0 (0,9)                       |
|                    |        | White | 31 (9-77)                     | 6 (0-19)                      | 28 (8,67)                     | 22 (7, 52)                    |
| 75-85              | Female | Black | 3 (0-11)                      | 3 (0-12)                      | 0 (0-15)                      | 0 (0-13)                      |
|                    |        | White | 12 (0-33)                     | 2 (0-12)                      | 9 (0-31)                      | 16 (0-42)                     |
|                    | Male   | Black | 2 (0-11)                      | 2 (0-19)                      | 0 (0-2)                       | 0 (0-2)                       |
|                    |        | White | 6 (0-38)                      | 3 (0-9)                       | 9 (0-33)                      | 11 (0-26)                     |

| <b>eTable 5:</b> Association between monthly influenza activity and hospitalizations for heart failure per 5% increase in influenza activity by age, region, ejection fraction and history of heart failure hospitalizations |                                         |                  |                         |
|------------------------------------------------------------------------------------------------------------------------------------------------------------------------------------------------------------------------------|-----------------------------------------|------------------|-------------------------|
|                                                                                                                                                                                                                              | Subgroup                                | IRR              | P-value for Interaction |
| Age Category                                                                                                                                                                                                                 | 55-74                                   | 1.15 (1.00-1.33) | 0.09                    |
|                                                                                                                                                                                                                              | 75-85                                   | 1.36 (1.13-1.65) |                         |
|                                                                                                                                                                                                                              | 85+                                     | 1.12 (0.88-1.41) |                         |
| Region                                                                                                                                                                                                                       | Maryland                                | 1.00 (0.70-1.41) | 0.41                    |
|                                                                                                                                                                                                                              | Minnesota                               | 1.38 (0.83-2.00) |                         |
|                                                                                                                                                                                                                              | Mississippi                             | 1.22 (1.06-1.40) |                         |
|                                                                                                                                                                                                                              | North Carolina                          | 1.20 (0.96-1.48) |                         |
| Ejection Fraction (LVEF)*                                                                                                                                                                                                    | Preserved (LVEF $\geq$ 50)              | 1.31 (1.09-1.59) | 0.51                    |
|                                                                                                                                                                                                                              | Reduced (LVEF <50)                      | 1.24 (1.05-1.47) |                         |
| History of Heart Failure                                                                                                                                                                                                     | First Heart Failure Hospitalization     | 1.05 (0.88-1.26) | 0.13                    |
|                                                                                                                                                                                                                              | Recurrent Heart Failure Hospitalization | 1.21 (1.05-1.39) |                         |

\* Ejection fraction was not reported for over 26% of adjudicated heart failure hospitalizations.

## eMethods

*Outcome:* The outcome of interest was definite or probable hospitalizations, aggregated by month/age/sex/race/site from Oct 2010 to Sep 2014. Specifically, the age categories used were 55-74, 75-84, and 85+ years of age for HF events and 35-74 and 75-85 for MI events, based on age at the time of hospitalization. Because of small numbers, blacks in Minneapolis and Washington County and persons reported to be neither black nor white were excluded from these analyses.

*Exposure:* The primary exposure was influenza-like illness (ILI) activity, as measured by % of visits in community for influenza-like illness. ILI activity was defined at the month/site level, and assumed constant across age/sex/race within month/site

*Additional Covariates:* Additional covariates included in our model were prior month's event count, age category, sex, race, region, and season. Prior month's event counts were defined at the age/sex/race/site level. Influenza seasons were defined twelve-month periods from October, when influenza activity often begins to increase, to the following September.

### *Regression Analysis:*

We used a Poisson model with the weighted total population at risk as an offset variable, defined as the total population within the specific demographic groups divided by sampling weight. Specifically, the population totals were defined at year/site/age/sex/race level and assumed constant across months within a given calendar year. The sampling weights were inverse probability weights, defined for individual events previously. Within each month/age/sex/race/age/site unit, there were either 0, 1, or 2+ sampling weights associated with them. We defined unit-specific sampling weight as follows.

- i. If exactly 1 sampling weight present: we used that weight
- ii. If 2+ sampling weights present:
  1. Multiplied each sampling weight by the associated event count to produce 2+ "weighted counts" within the unit
  2. summed the "weighted counts" within the unit
  3. summed the unweighted event counts within the unit
  4. defined unit-specific sampling weight = 
$$\frac{\text{sum of unweighted event counts}}{\text{sum of weighted events counts}}$$
- iii. If 0 sampling weights present: we averaged the sampling weights from the month immediately before and/or after the month in question to interpolate the presumed sampling weight.
